# Supplementary material for: Sialyltransferase inhibition leads to inhibition of tumor cell interactions with E-selectin, VCAM1, and MADCAM1, and improves survival in a human multiple myeloma mouse model
Source: PubMed Central journal article supplement — Haematologica. 2019 May 17;105(2):457–67. doi: 10.3324/haematol.2018.212266 (PMC7012485; doi:10.3324/haematol.2018.212266), 2020-02
Supplement: 2018_212266-Disclosures_and_Contributions.pdf [file 2018_212266-Disclosures_and_Contributions.pdf]

Haematologica  
HAEMATOL/2018/212266  
Version 3

Sialyltransferase inhibition leads to inhibition of tumor cell interactions with E-selectin, VCAM1, and MADCAM1, and improves survival in a human multiple myeloma mouse model

Alessandro Natoni, Mariah L. Farrell, Sophie Harris, Carlyne Falank, Lucy Kirkham-McCarthy, Matthew S. Macauley, Michaela R. Reagan, and Michael O' Dwyer

Disclosures: Funds for this study were provided by the Health Research Board (CSA 2012/10) and NIH's National Institute of General Medical Sciences (NIH P30 GM106391, P30GM103392, P20GM121301, and U54GM115516). The authors' work is also supported by start-up funds from the Maine Medical Center Research Institute, a pilot awarded to Dr. Reagan and core facilities from the Massachusetts General Hospital Center for Skeletal Research (NIH/NIAMS P30AR066261), and a pilot grant from the American Cancer Society (Research Grant #IRG-16-191-33; Reagan PI) Prof Michael MD O'Dwyer is listed as an inventor on the patent application US20170327899A1 (<https://patents.google.com/patent/US20170327899A1/en>)

Contributions: AN and MLF contributed equally to this work MRR and MO'D are joint senior authors of this work Study design: AN, MF, MR, and MO'D. Study conduct: AN, MF and MR. Data collection: AN, MF, HF, CF, KMcl and MR. Data analysis: AN, MF, KMcl and MR. Data interpretation: MF, AN, MR, MO'D, MM. Writing manuscript: AN, MF, MO'D and MR. Approving final version of manuscript: AN, MF, MR and MO'D. MR and MO'D takes responsibility for the integrity of the data analysis.
